# Supplementary material
Source: PubMed Central journal article supplement (PMC8026515)
Supplement: NIHMS1658332-supplement-1.pdf [file NIHMS1658332-supplement-1.pdf]

# **Supplementary Information**

## **Supplementary Figures**

Figure S1

A

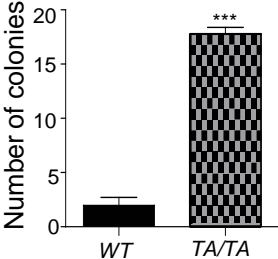

B

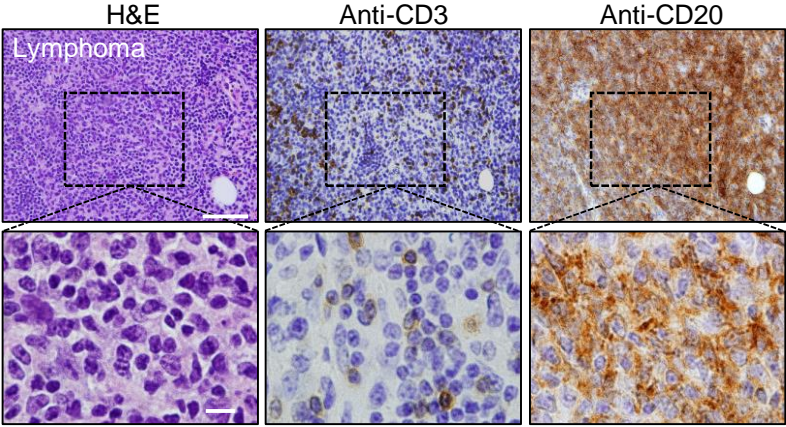

C

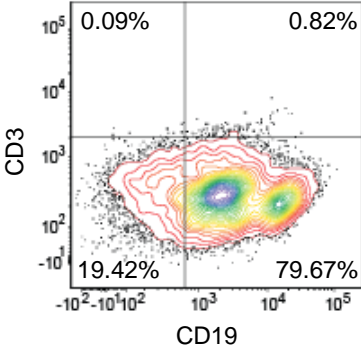

D

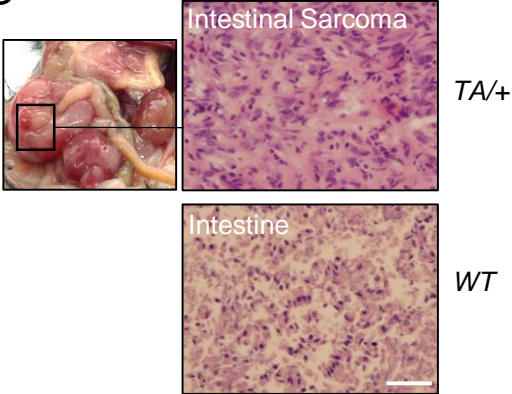

E

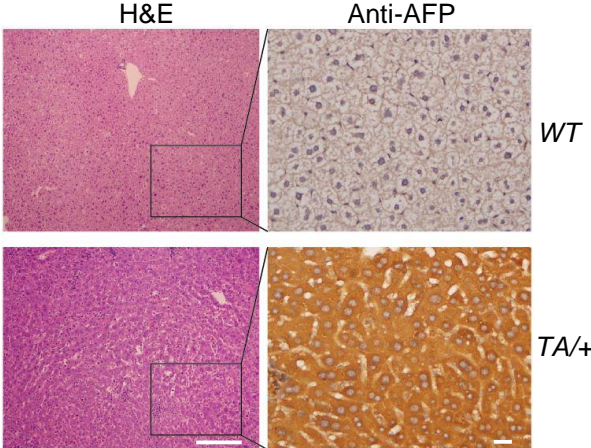

F

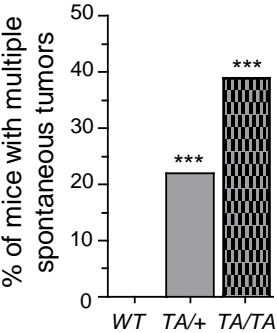

**Supplementary Fig. S1: *Plk1* overexpression induces transformation and spontaneous tumor development.** (Related to Fig. 2). **(A)** Spontaneous immortalized *WT* and *Plk1*<sup>TA/TA</sup> transgenic MEFs were plated in soft agar and grown for 21 days. Graph represents the number of colonies counted for each genotype. The experiment was repeated 3 times. (Mean  $\pm$  SEM, \*\*\*:  $p < 0.001$  Student's *t* test). **(B)** Immunohistochemistry (IHC) staining of CD3 and CD20 proteins of representative spontaneous lymphoma derived from *Plk1* transgenic mice with corresponding H&E staining. Top scale bar 100 $\mu$ m, bottom scale bar 20 $\mu$ m. **(C)** CD3 and CD19 cell surface expression was assessed by flow cytometry in cells from a representative spontaneous lymphoma collected from a *Plk1* transgenic mouse. Numbers in each quadrant indicate percentage of the total population. **(D)** A representative spontaneous intestinal sarcoma from transgenic *TA/+* mice along with its corresponding H&E staining. Staining of *WT* intestine tissue is shown below. Scale bar: 100  $\mu$ m. **(E)** IHC staining of AFP protein in liver tissues from *WT* and *Plk1* transgenic mice with corresponding H&E staining. Left scale bar 100  $\mu$ m; right scale bar 20  $\mu$ m. **(F)** Incidence of *WT* and *Plk1* transgenic mice with multiple spontaneous tumors. (*WT* vs *TA/+* or *WT* vs *TA/TA*: \*\*\*:  $p < 0.001$ , Chi-squared test).

# Figure S2

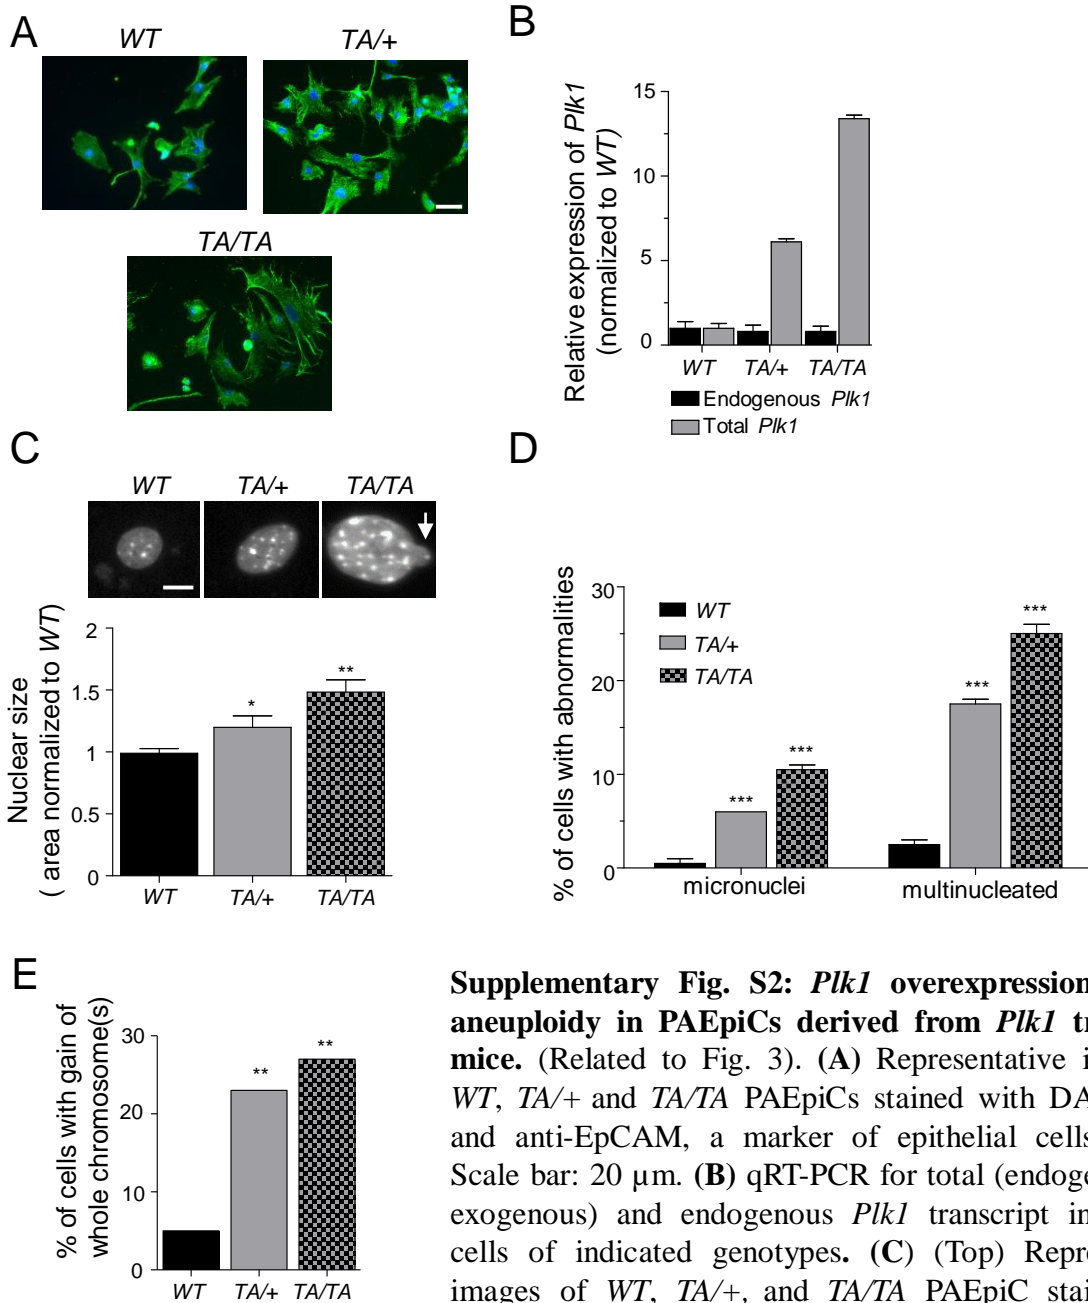

**Supplementary Fig. S2: *Plk1* overexpression induces aneuploidy in PAEpiCs derived from *Plk1* transgenic mice.** (Related to Fig. 3). (A) Representative images of WT, TA/+ and TA/TA PAEpiCs stained with DAPI (blue) and anti-EpCAM, a marker of epithelial cells (green). Scale bar: 20  $\mu$ m. (B) qRT-PCR for total (endogenous and exogenous) and endogenous *Plk1* transcript in PAEpiC cells of indicated genotypes. (C) (Top) Representative images of WT, TA/+, and TA/TA PAEpiC stained with DAPI. (Bottom) Graph representing nuclear size of WT, TA/+, and TA/TA PAEpiCs, normalized to WT PAEpiCs. Fifty cells/genotype, repeated 3x. (Mean  $\pm$  SEM, \*:  $p < 0.05$ ; \*\*:  $p < 0.01$ ). Scale bar: 10  $\mu$ m. Arrow: nuclear buds. (D) Graph representing percentage of micronucleated or multinucleated WT, TA/+, and TA/TA PAEpiCs. Fifty cells/genotype, repeated 3x. (Mean  $\pm$  SEM, \*\*\*:  $p < 0.001$ ). (E) Graph representing percentage of WT, TA/+, and TA/TA PAEpiCs with gains of whole chromosome(s). One hundred cells/genotype, repeated 2x. (\*\*:  $p < 0.01$ , Chi-squared test).

# Figure S3

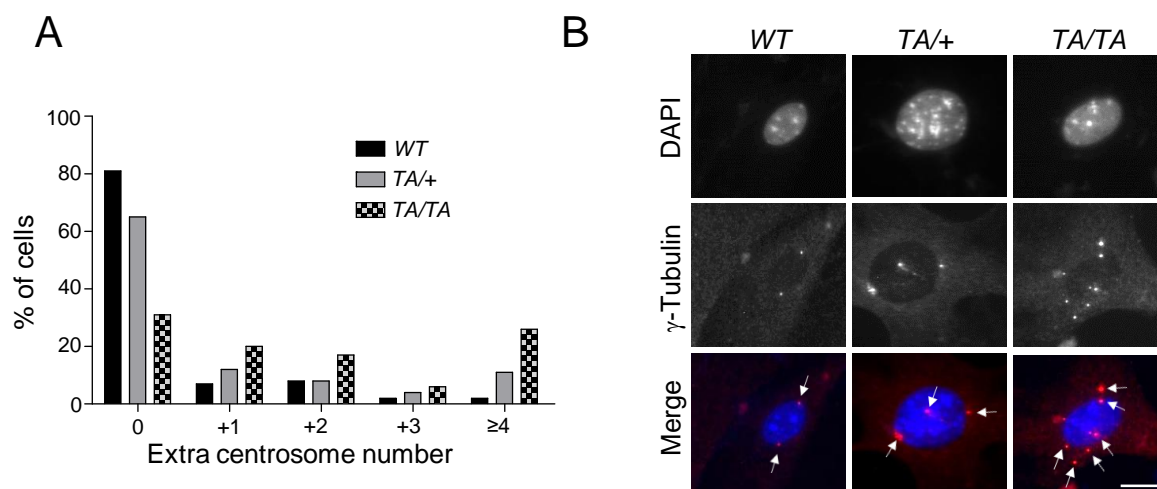

**Supplementary Fig. S3: *Plk1* overexpression leads to centrosome amplification in *Plk1* transgenic PAEpiCs.** (Related to Fig. 4). **(A)** Centrosome count of *WT*, *TA/+*, and *TA/TA* PAEpiCs immunostained for  $\gamma$ -Tubulin. One-hundred metaphases/genotype counted. **(B)** Representative images of *WT* and *Plk1* transgenic PAEpiC cells immunostained for  $\gamma$ -Tubulin (red) and DAPI (blue). Scale bar: 10  $\mu$ m. White arrow: centrosome.

# Figure S4

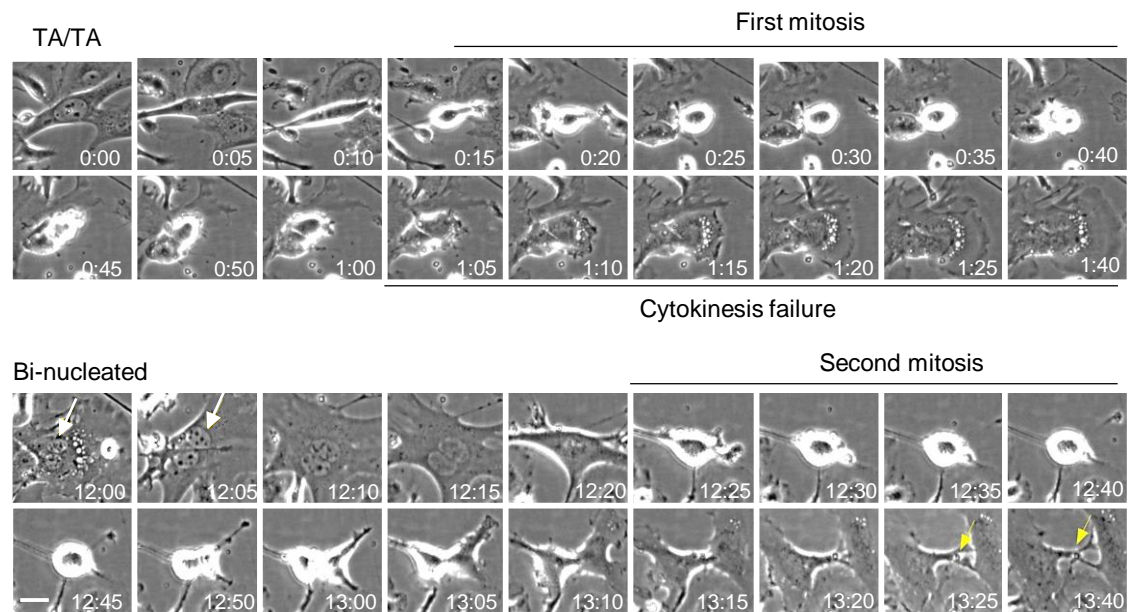

**Figure S4: *Plk1* overexpression promotes proliferation of giant polyploidy PAEpiC.** Representative binucleated *TA/TA* PAEpiC monitored during 2 cell divisions. Arrow: -White : binucleated cell. - Yellow: abscission failure. Scale bar: 10 mm.

Figure S5

A

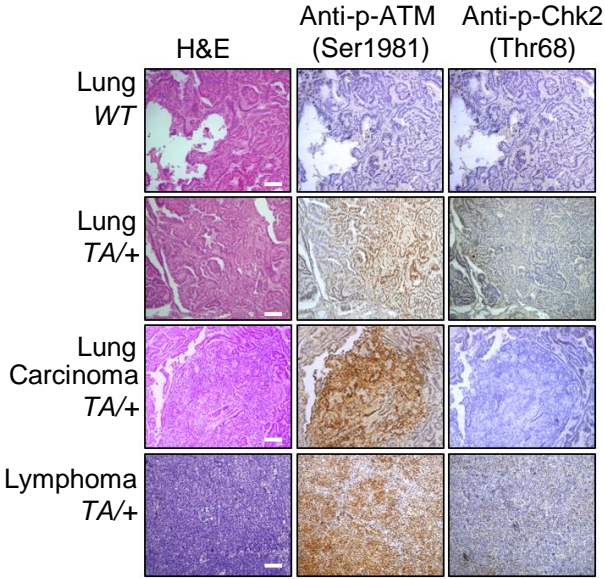

B

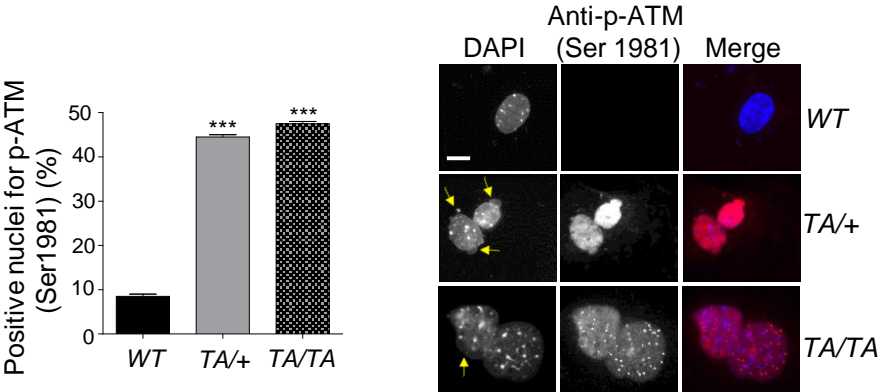

C

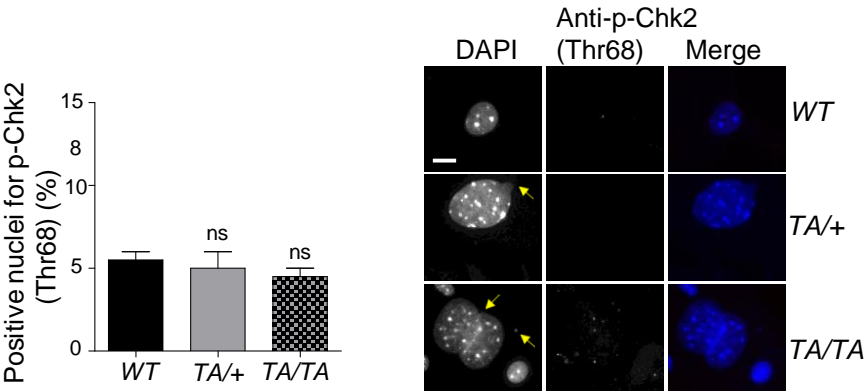



**Supplementary Fig. S5: The effect of *Plk1* overexpression on the ATM/Chk2 signaling.** (Related to Fig. 6). **(A)** IHC staining of phospho-ATM (Ser1981) and phospho-Chk2 (Thr68) in nonmalignant and malignant (carcinoma and lymphoma) tissues from *Plk1*<sup>TA/+</sup> transgenic mice, as well as lung tissues from *WT* mice, along with corresponding H&E staining. Scale bar: 100  $\mu$ m. **(B-C)** (Left) Percentage of PAEpiCs of indicated genotypes positive for phospho-ATM (Ser1981) (B) and phospho-Chk2 (Thr68) (C) staining. 100 cells/genotype, repeated 2x. (Mean  $\pm$  SEM, *WT* vs *TA/+* or *TA/TA*: \*\*\*:  $p < 0.001$ ). (Right) Representative images from PAEpiCs of indicated genotypes immunostained for phospho-ATM (Ser1981) (B) and phospho-Chk2 (Thr68) (C) in red and Dapi in blue. Scale, 10  $\mu$ m. Yellow arrow: nuclear abnormalities (micronuclei, binucleated cells, and nuclear buds).



# Figure S6

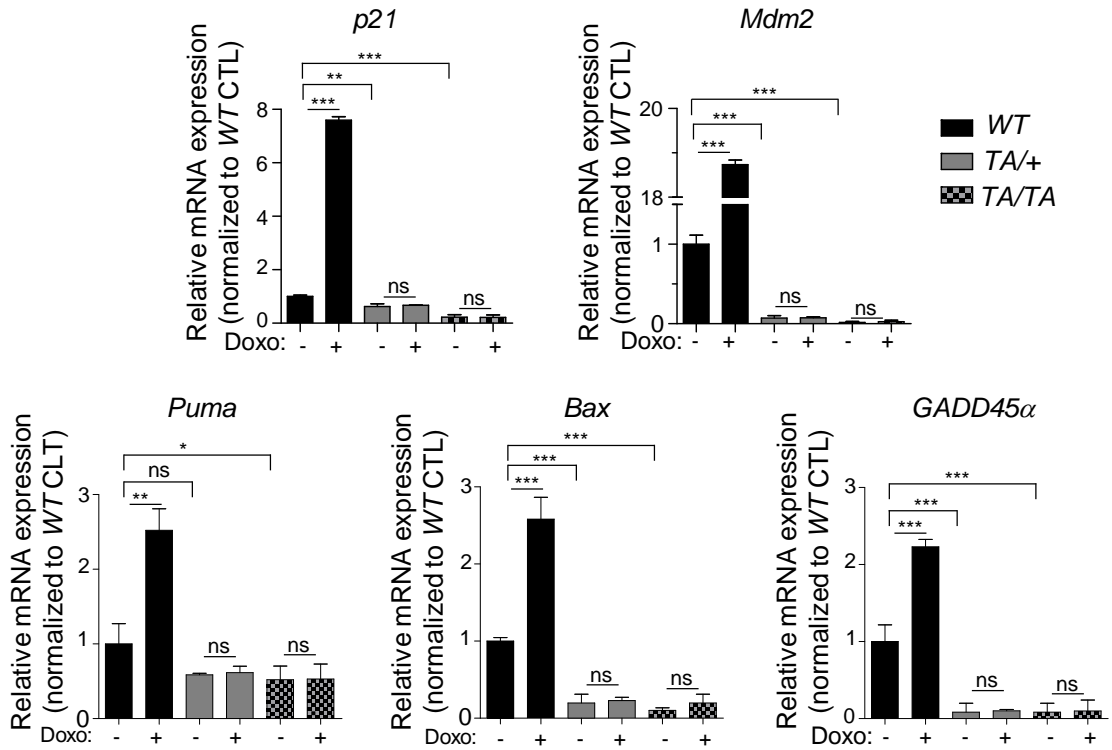

**Supplementary Fig. S6: The expression of p53 target genes in *Plk1* transgenic PMEFs.** (Related to Fig. 6). qRT-PCR analysis of 5 canonical targets of p53 (*p21*, *Mdm2*, *Puma*, *Bax*, and *GADD45α*) in PMEFs with the indicated genotypes in the presence or absence of doxo (0.5 mM for 6 hrs). GAPDH was used as internal control. Repeated 3x. (Mean  $\pm$  SEM, \*:  $p < 0.05$ ; \*\*:  $p < 0.01$ ; \*\*\*:  $p < 0.001$ , t-test).

# Figure S7

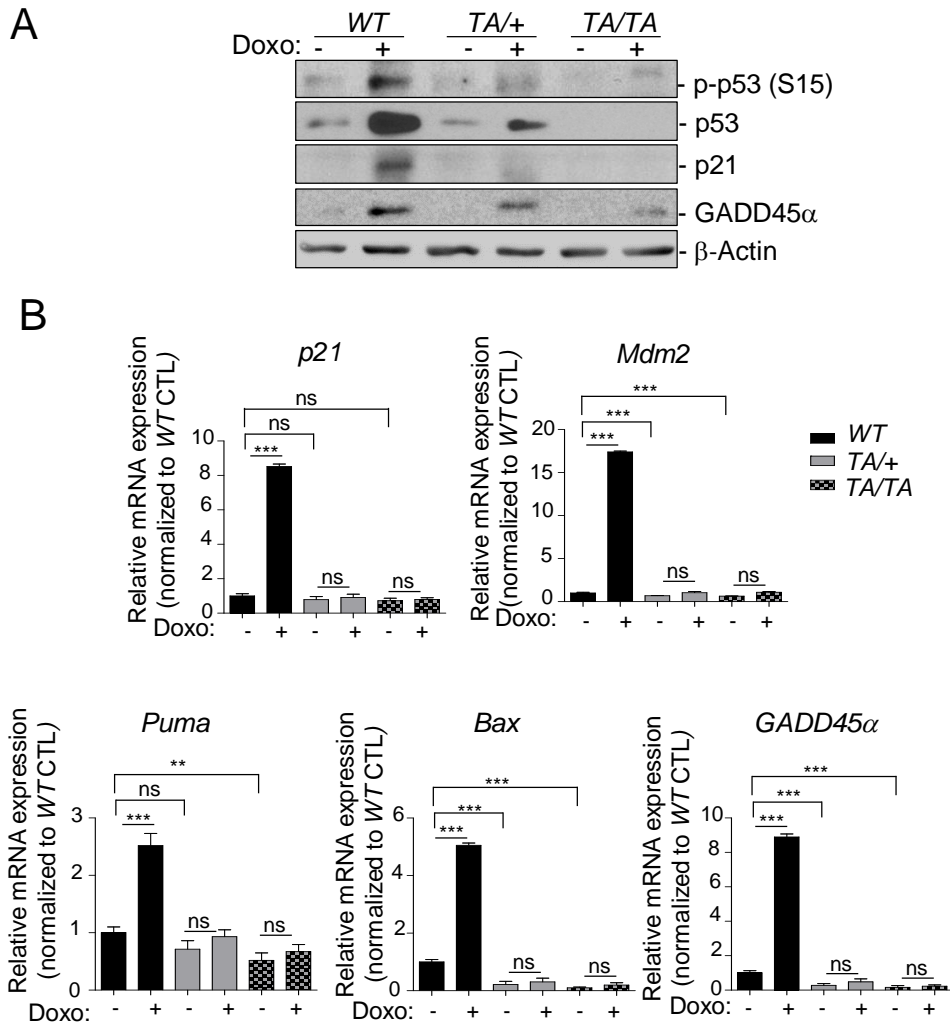

**Supplementary Fig. S7: *Plk1* overexpression compromises the DNA-damage response in PAEpiCs.** (Related to Fig. 6). (A) PAEpiCs of the indicated genotypes were treated with or without Doxo (0.5 mM for 2 hrs). p53 expression and activity (phosphor-Ser15), and its target gene expression (*p21* and *GADD45α*) were examined by Western blotting. (B) qRT-PCR analysis of 5 canonical targets of p53 (*p21*, *Mdm2*, *Puma*, *Bax*, and *GADD45α*) in PAEpiCs of the indicated genotypes in the presence or absence of doxo (0.5 mM for 6 hrs). GAPDH was used as internal control. Repeated 2x. (Mean  $\pm$  SEM, \*:  $p < 0.05$ ; \*\*:  $p < 0.01$ ; \*\*\*:  $p < 0.001$  t-test)

# Figure S8

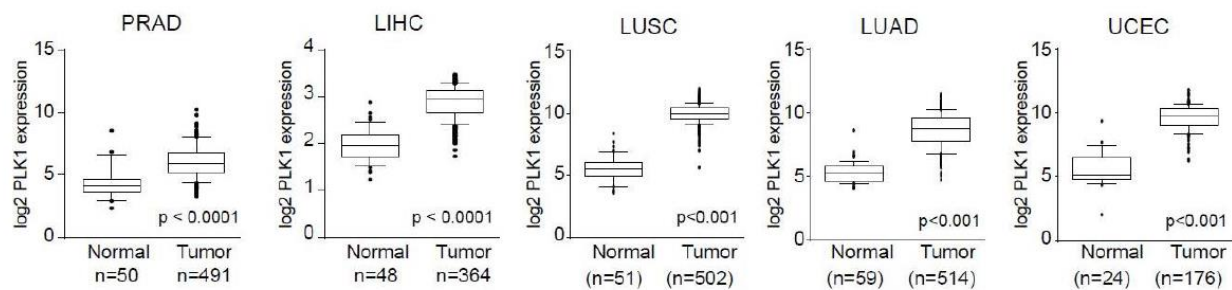

**Supplementary Fig .S8 : *PLK1* is overexpressed in human cancers.** (Related to Fig. 7)  
Comparison of PLK1 expression levels in PRAD, LIHC, LUSC, LUAD, UCEC cohorts and their corresponding normal tissues.

## Supplementary Video Legends

**Video 1: *Plk1* overexpression promotes lagging chromosomes and the formation of micronucleated cells.** *TA/+* PMEFs expressing H2B-mCherry were recorded (3 min/image) as cells entered mitosis. White arrows indicate micronuclei.

**Video 2: *Plk1* overexpression promotes lagging chromosome and cytokinesis failure, resulting in formation of binucleated progeny.** *TA/TA* PMEFs expressing H2B-mCherry were recorded (every 3 min/image) as cells entered mitosis. White arrow indicates chromatin bridges.

**Video 3: *Plk1*-overexpressing PMEFs display an increase in centrosomes number, leading to multipolar spindles and mitotic errors.** *WT* (Left) and *TA/TA* PMEFs (Right) co-expressing H2BmCherry and EGFP- $\alpha$ -Tubulin were recorded (every 3 min/image) as cells entered mitosis. White arrows indicate centrosomes.

**Video 4: *Plk1* overexpression promotes proliferation of cells with CIN. Video 4A:** A binucleated *TA/TA* PMEF expressing H2B-mCherry was recorded (every 3 min/image) as the cell entered mitosis. Chromosome segregation failure led to the formation of progeny cells with micronuclei. **Video 4B:** A binucleated *TA/TA* PMEF expressing H2B-mCherry was recorded (every 3 min/image) as the cell entered mitosis. The failures in chromosome segregation and cytokinesis led to the formation of a giant multinucleated progeny cell.

**Video 5: Multinucleated *Plk1* PMEFs are able to progress through a second round of cell division.** *TA/TA* PMEFs were recorded by phase-contrast video-microscopy for 24 hrs at a rate of 4 min/image. Red arrow points out a binucleated cell that progressed through 2 rounds of cell division with cytokinesis failure, leading to the formation of a giant multinucleated progeny cell.

## Supplementary Materials and Methods

### Antibodies

| Antibodies                      | SOURCE         | IDENTIFIER   |
|---------------------------------|----------------|--------------|
| anti-GFP                        | GeneTex        | GTX113617    |
| anti-PLK1                       | Millipore      | clone 35-206 |
| anti-phospho-Histone H3 (Ser10) | Millipore      | 06-570       |
| anti- $\gamma$ Tubulin          | Santa Cruz     | sc-17787     |
| Pacific Blue anti-Annexin V     | BioLegend      | 640917       |
| PE anti-CD3                     | BioLegend      | 100205       |
| FITC anti-CD19                  | BioLegend      | 152403       |
| anti-CD326 (Ep-CAM)             | BioLegend      | clone G8.8   |
| anti-CD31                       | BioLegend      | MEC13.3      |
| anti-CD45                       | BioLegend      | 30-F11       |
| c-PARP-1                        | Cell signaling | Asp214       |
| c-caspase 3                     | Cell signaling | Asp175       |
| anti-p53 (A-1)                  | Santa Cruz     | sc-393031    |
| Phospho-p53 (Ser15)             | Cell signaling | #9284        |
| Anti-p21                        | Santa Cruz     | sc-6246      |
| anti-BubR 1                     | Abcam          | ab54894      |
| anti-Cdc20                      | cell signaling | 14866        |
| Anti-rabbit polyclonal AFP      | Proteintech    | 14550-1-AP   |
| anti-phospho-ATM Ser1987        | Abcam          | ab81292      |
| phospho-Chk2 Thr68              | GeneTex        | GTX55055     |
| anti-Ki67                       | Abcam          | ab15580      |
| $\beta$ -Actin                  | Santa Cruz     | sc-47778     |
| anti- $\alpha$ -Tubulin         | Sigma          | #T5168       |
| anti-GAPDH                      | Santa Cruz     | sc-32233     |
| anti-rabbit IgG-HRP             | Santa Cruz     | sc-2357      |
| anti-mouse IgG-HRP              | Santa Cruz     | sc-516102    |

### Primers for mouse genotyping

| Primers for genotyping       |                                       |
|------------------------------|---------------------------------------|
| Forward primer for Hprt-Cre: | 5'-ACC AGC CAG CTA TCA ACT CG -3'     |
| Reverse primer for Hprt-Cre: | 5'-TTACATTGGTCCAGCCACC -3'            |
| Forward primer for NEO:      | 5'-AGGATCTCCTGTCATCTCACCTTGCTCCTG-3'  |
| Reverse primer for NEO:      | 5'-AAGAAGCTCGTCAAGAAGGCGATAGAAGGCG-3' |
| Forward primer for PLK1:     | 5'-GGCGGCTCTAGAGCCTCTGCTAACC-3'       |
| Reverse primer for PLK1:     | 5'-CTCGAAGCATTGGCGAAGCCTCC-3'         |

### Isolation and culture of Pulmonary alveolar epithelial cells (PAEpiCs)

PAEpiCs were isolated from 2-month-old control and *Plk1* transgenic mice according a previously described procedure (1). Briefly, mice were euthanized using an approved inhaled procedure. Cardiac perfusion with 10-mL D-PBS from the right ventricle was performed. The trachea was exposed and intubated with a 20-gauge catheter, allowing perfusion of the lungs with 2-mL dispase. After infiltration with dispase, the lungs were isolated from the thoracic cavity and

incubated for 20 min in 5-mL dispase at room temperature on an agitation table. The lungs were then minced using scissors and transferred in 10-mL complete DMEM containing 10 mM HEPES, 10% FBS, 1% penicillin-streptomycin, and 1% non-essential amino acids. After mincing, 100  $\mu$ L of DNase I (1 mg/mL) was added to the sample and incubated for 10 min at room temperature on an agitation table. The cells were sequentially filtered through 70- $\mu$ m and 40- $\mu$ m filters, and 500  $\mu$ L of AKC lysis buffer was added to remove the red blood cells. The cell suspension was then centrifuged for 10 min at 1500 rpm at room temperature. The cell pellet was resuspended in 500- $\mu$ L complete DMEM for selection of PAEpiCs using the magnetic bead selection procedure. The cell suspension was first incubated with anti-CD45, anti-CD16/32, and anti-CD31 conjugated dynabeads for 1 hr to remove hematopoietic cells (CD45 positive), alveolar macrophages (CD45 positive and CD16/32 positive), and endothelial cells (CD31 positive) from the suspension. The suspension was then incubated with anti-EpCAM (epithelial marker)-conjugated dynabeads for 1 hr at 37°C. A magnetic separator was used to sort the bead-bound cells (EpCAM<sup>+</sup>). Isolated cells were resuspended in complete DMEM and plated in an appropriately sized culture flask. The purity of PAEpiCs was assessed by immunostaining using anti-EpCAM antibody (supplemental Fig. S2A). PAEpiCs were maintained in DMEM (containing 10% fetal bovine serum [FBS], 1% penicillin-streptomycin, and 1% non-essential amino acids, 10mM HEPES).

### *Metaphase spread*

Chromosome counts were performed on the metaphase spreads of P1 PMEFs, PAEpiCs, and lymphomas from *Plk1* transgenic mice. Cells were treated with 0.5- $\mu$ g/mL colcemid for 6 h, and collected by centrifugation. The cells were incubated in a hypotonic solution (0.075-M KCl) for 30 min at 37°C and 5 drops of fixation solution (methanol/acetic acid 3:1) were added before centrifugation at 1200 rpm for 10 min. Supernatant was removed and cells were resuspended in

fixation solution and incubated at 4°C for 10 min, followed by rinsing 3 times with fixation solution. The cells were dropped onto glass slides in a humidified chamber (45% humidity, 22°C). The slides were dried and stained in trypsin-Giemsa solution. The stained slides were examined under a light microscope using Cytovision software. Chromosomes from 100 cells per genotype were counted.

### *Quantitative real-time PCR*

Total RNA was extracted from cells or tissue using Trizol (Thermo Fisher Scientific the RNeasy Mini Kit (Qiagen) and cDNAs were generated with the Script Reverse Transcription Supermix Kit (Bio-Rad), according to the manufacturer's instructions. qRT-PCR reactions were performed using a StepOne Plus (Applied biosystem) thermal cycler and the SYBR Green Mix (Thermo Scientific). Data were evaluated by the  $\Delta\Delta C_t$  method with GAPDH as a housekeeping gene for normalization. Primer sequences:

| Primers for qRT-PCR       |                                |
|---------------------------|--------------------------------|
| Trans-PLK1-Forward (p1):  | 5'-AATTCCGGAGGTCCTAGTGG-3'     |
| Trans-PLK1-Reverse (p2):  | 5'-CTACGACGTGTTGGTGTGCT-3'     |
| Endo-PLK1-Forward (p3):   | 5'-CAGGTTCCGTGGAGCAACTT-3'     |
| Endo-PLK1-Reverse (p4):   | 5'-GGACCTCCGGAATTTCTTTC-3'     |
| p21-Forward:              | 5'-CAAGAGGCCCACTACTTCCT-3'     |
| p21-Reverse:              | 5'-ACACCAGAGTGCAAGACAGC-3'     |
| Bax-Forward:              | 5'-TAGCAAACCTGGTGCTCAAGG-3'    |
| Bax-Reverse:              | 5'-TCTTGGATCCAGACAAGCAG-3'     |
| Mdm2-Forward:             | 5'-CTAGCTTCTCCCTGAATGCC-3'     |
| Mdm2-Reverse:             | 5'-TTGCACACGTGAAACATGAC-3'     |
| Puma-Forward:             | 5'-GTACGAGCGGCGGAGACAAG-3'     |
| Puma-Reverse:             | 5'-GCACCTAGTTGGGCTCCATTTCTG-3' |
| GADD45 $\alpha$ -Forward: | 5'-GCGGTTCAGAAGATGCAGGC-3'     |
| GADD45 $\alpha$ -Reverse: | 5'-GGTTGTGCCCAATGTCTCCG-3'     |
| GAPDH-Forward:            | 5'-TGCACCACCAACTGCTTAGC-3'     |
| GAPDH-Reverse:            | 5'-TGGATGCAGGGATGATGTTC-3'     |

### *Analysis of p53 mutations by Sanger sequencing*

To identify potential mutations in the *p53* gene, genomic DNA was extracted from PMEFs, immortalized MEFs, lungs, spleens, and derived tumors of *WT*, *Plk1*<sup>TA/+</sup>, and *Plk1*<sup>TA/TA</sup> mice using



QIAamp DNA Mini Kit in accordance with the manufacturer's instructions. The coding regions of the *p53* gene were amplified by PCR. Multiple primer sets were used covering all coding regions of *p53* (exons 2-11) as described in (2). These primers sets were designed using a serial linked pipeline to ensure high fidelity of the sequencing results. PCR primers for amplifying genomic DNA sequences within exons 2-11 of *p53* gene are summarized below. The PCR mixture (50  $\mu$ L) consisted of 200 ng of DNA template, 1.5  $\mu$ L of each forward and reverse primer (10  $\mu$ M), 1 $\mu$ L of high-fidelity Hot Start KOD DNA polymerase, 3  $\mu$ L of MgCl<sub>2</sub> (25 mM), 5  $\mu$ L PCR buffer, and 5 $\mu$ L of dNTP mix (2mM each). PCR amplification was programmed with an initial denaturation step at 95°C for 5 min, followed by 35 cycles of denaturation, annealing and primer extension. The annealing cycle was set to 60°C for 30 s per cycle. The conditions for the primer extension step were 70°C for 30 s per cycle. Upon completion of the cycling steps, a final extension step was performed at 70°C for 5 min. The PCR products were then purified using QIAquick Gel Extraction Kit (QIAGEN) in accordance with the manufacturer's instructions. The PCR products were analyzed by Sanger sequencing, which was performed by Eurofins Genomics. Sequences from *WT*, *Plk1<sup>TA/+</sup>*, and *Plk1<sup>TA/TA</sup>* tissue were aligned and compared among them, and to the mouse reference genome of *p53* (NCBI) using the Multiple Sequence Alignment website Clustal Omega.

Primer sequences:

| Primers for p53 sequencing |                                                      |
|----------------------------|------------------------------------------------------|
| p53-E2-Forward             | 5'-CTCGTGTA AAAACGACGGCCAGTCCCTACTGGATGTCCACCTTC-3'  |
| p53-E2-Reverse             | 5'-CTGCTCAGGAAACAGCTATGACTTTGTTTCTCTCAGGCAAGGG-3'    |
| p53-E3-Forward             | 5'-CTCGTGTA AAAACGACGGCCAGTTTCAAACATGGTATGGTGTGGG-3' |
| p53-E3-Reverse             | 5'-CTGCTCAGGAAACAGCTATGACTGGATGGGACAAAGAAGAACCC-3'   |
| p53-E4-Forward             | 5'-CTCGTGTA AAAACGACGGCCAGTGTGGGCTGGTAGGCTGAGAAC-3'  |
| p53-E4-Reverse             | 5'-CTGCTCAGGAAACAGCTATGACAGAGGCATTGAAAGGTCACACG-3'   |
| p53-E5-Forward             | 5'-CTCGTGTA AAAACGACGGCCAGTCACCTGATCGTTACTCGG5'-CTTG |
| p53-E5-Reverse             | 5'-CTGCTCAGGAAACAGCTATGACTGCCTGTCTCCAGATACTCGG-3'    |
| p53-E6-Forward             | 5'-CTCGTGTA AAAACGACGGCCAGTCTGCTCCGATGGTATGGTAAG-3'  |
| p53-E6-Reverse             | 5'-CTGCTCAGGAAACAGCTATGACACTCAGCGTCTCTATTTCCCGC-3'   |
| p53-E7-Forward             | 5'-CTCGTGTA AAAACGACGGCCAGTAGGTAGGGAGCGACTTCACCTG-3' |
| p53-E7-Reverse             | 5'-CTGCTCAGGAAACAGCTATGACCTCGTGGAACAGAAACAGGCAG-3'   |
| p53-E8-Forward             | 5'-CTCGTGTA AAAACGACGGCCAGTTCTTACTGCCTTGTGCTGGTCC-3' |

|                       |                                                     |
|-----------------------|-----------------------------------------------------|
| p53-E8-Reverse        | 5'-CTGCTCAGGAAACAGCTATGACAATGGGTACAGCTTGTCTCTGGC-3' |
| p53-E9-Forward        | 5'-CTCGTGTA AACGACGGCCAGTGGAAAGTCCTTTGCCCTGAACTG-3' |
| p53-E9-Reverse        | 5'-CTGCTCAGGAAACAGCTATGACCTGAGAACCAGTGTCTGGAGGAG-3' |
| p53-E10-Forward       | 5'-CTCGTGTA AACGACGGCCAGTTCGTGAAAGTGGTTGTGTGACC-3'  |
| p53-E10-Reverse       | 5'-CTGCTCAGGAAACAGCTATGACTGCAGCCCTAAGCATCTAGCAG-3'  |
| p53-E11 start-Forward | 5'-CTCGTGTA AACGACGGCCAGTTCCTACCCATAGTAGAAGCCATC-3' |
| p53-E11 start-Reverse | 5'-CTGCTCAGGAAACAGCTATGACGGGATGCAGAGGCAGTCAGTC-3'   |
| p53-E11 end-Forward   | 5'-CTCGTGTA AACGACGGCCAGTAGCTCCCATCACTTCATCCCTC-3'  |
| p53-E11 end-Reverse   | 5'-CTGCTCAGGAAACAGCTATGACGGCCAGCAGAGACCTGACAAC-3'   |

### *Fluorescence in situ hybridization*

Paraffin sections were analyzed by FISH. Probes from 2 mouse bacterial artificial chromosome (BAC) clones (Empire Genomic) of chromosome 6 (RP23-20F16) and chromosome 18 (RP23-263F6) were labeled with Spectrum Red-dUTP and Spectrum Green-dUTP, respectively. The number of hybridization signals for these probes was assessed in 100 interphase nuclei with well-delineated contours.

### *Lentivirus preparation and infection*

Lentiviral vectors pLenti6-H2B-mCherry (addgene Plasmid #89766), and L304-EGFP-Tubulin-WT (addgene, Plasmid #64060) along with packing (psPAX2) and envelope (pMD2.G) vectors were transfected into 293T cells using PEI. The supernatants were collected after transfection for 48 hrs and 72 hrs, filtered through a 0.45 µm filter, and concentrated by ultracentrifugation at 28,000 rpm at 4°C for 2 hrs. Resuspended viral pellets in the presence of 8 µg/mL of polybrene were used to infect cells.

### *Senescence-associated β-galactosidase activity*

Cells were fixed with 2% paraformaldehyde and 0.2% glutaraldehyde in PBS, pH 7.4, for 5 min and incubated at 37°C overnight in staining solution (40-mM sodium citrate, pH 6.0, 1% X-

gal, 5-mM potassium ferrocyanide, 5-mM ferricyanide, 150-mM NaCl, and 2-mM MgCl<sub>2</sub>). Cultures were examined under phase-contrast microscopy.

#### *Subcellular protein fractionation*

Cells were lysed in hypotonic buffer (10-mM HEPES-KOH, 1.5-mM MgCl<sub>2</sub>, 10-mM KCl, 0.5-mM DTT, 0.2-mM PEFA 1023, pH 7.9, 0.5% NP-40). Cell lysates were centrifuged for 10 s at 16 000 g at 4°C. The supernatants were collected (cytoplasmic extracts), and the pellets were washed twice with hypotonic buffer and lysed with high-salt buffer (450-mM NaCl, 1-mM PMSF, 50-mM Tris pH 7.4, 0.2-mM Na<sub>3</sub>VO<sub>4</sub>, 5-mM β-glycerophosphate, 20% glycerol, 2-mM DTT, 1% NP-40), following incubation for 10 min at 4°C (nuclear extracts).

#### *Meta-analysis*

Genomic segmentation profiling and PLK1 expression levels from a large collection of LIHC, PRAD, SARC, LUSC, and LUAD samples were downloaded from The Broad Institute's TCGA data repository. The "genome\_wide\_snp\_6- segmented\_scna\_minus\_germline\_cnv\_hg19 (MD5)" was used in all datasets. Genome-wide segment counts were summed for each sample according to segment mean data generated based on hg19 reference with germline probes removed. Log<sub>2</sub> transformed normalized PLK1 expression and Overall survival (OS) information was downloaded from UCSC Xena platform (<https://www.biorxiv.org/content/10.1101/326470v3>). Gene expression between normal and tumor were compared with two-tailed unpaired t test under unequal variance assumption. Pearson correlation analysis was used to evaluate association between PLK1 expression and genome segmentation counts. Cutoff finder was used to decide the optimal split for segment count and PLK1 expression to expect survival significance (<http://molpath.charite.de/cutoff/>). Statistical Package for the Social Sciences (SPSS) software was

used to plot Kaplan-Meier survival curves and to perform log-rank test. GraphPad Prism was used to create box plots and scatter plots."

## **References**

1. Sinha M, Lowell C. Isolation of Highly Pure Primary Mouse Alveolar Epithelial Type II Cells by Flow Cytometric Cell Sorting. Bio-Protocol, LLC; 2016.
2. Wang Y, Zhang Y, Yang J, Ni X, Liu S, Li Z, et al. Genomic Sequencing of Key Genes in Mouse Pancreatic Cancer Cells. Curr Mol Med; 2012
