# Supplementary material
Source: PubMed Central journal article supplement (PMC8026515)

Full scan WB

WB figure 1F

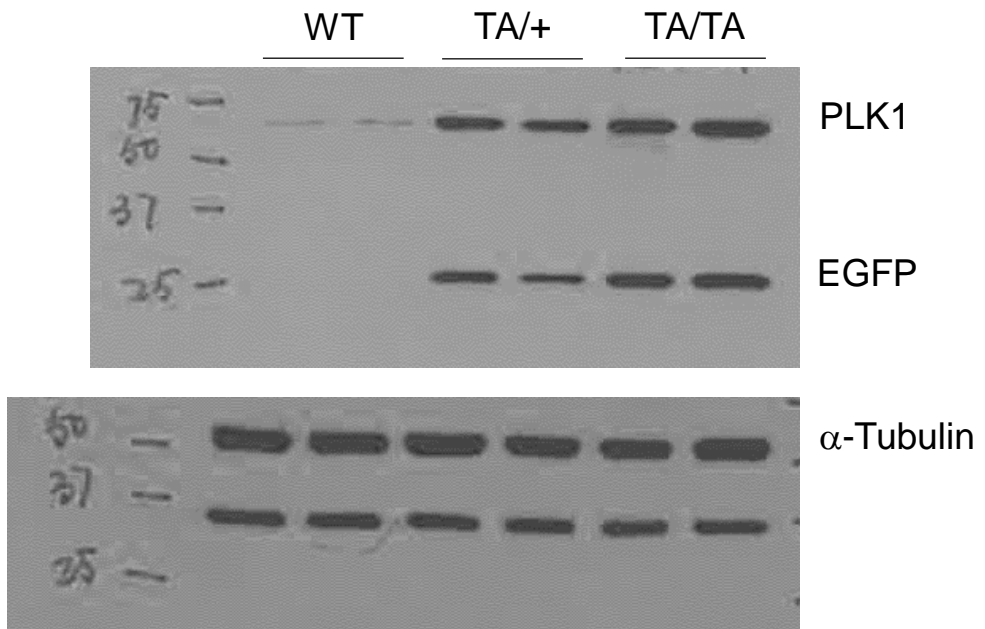

WB figure 1G

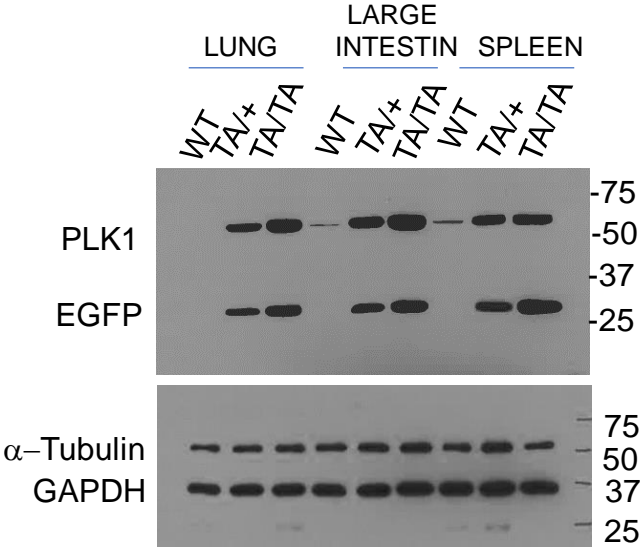

WB figure 6B

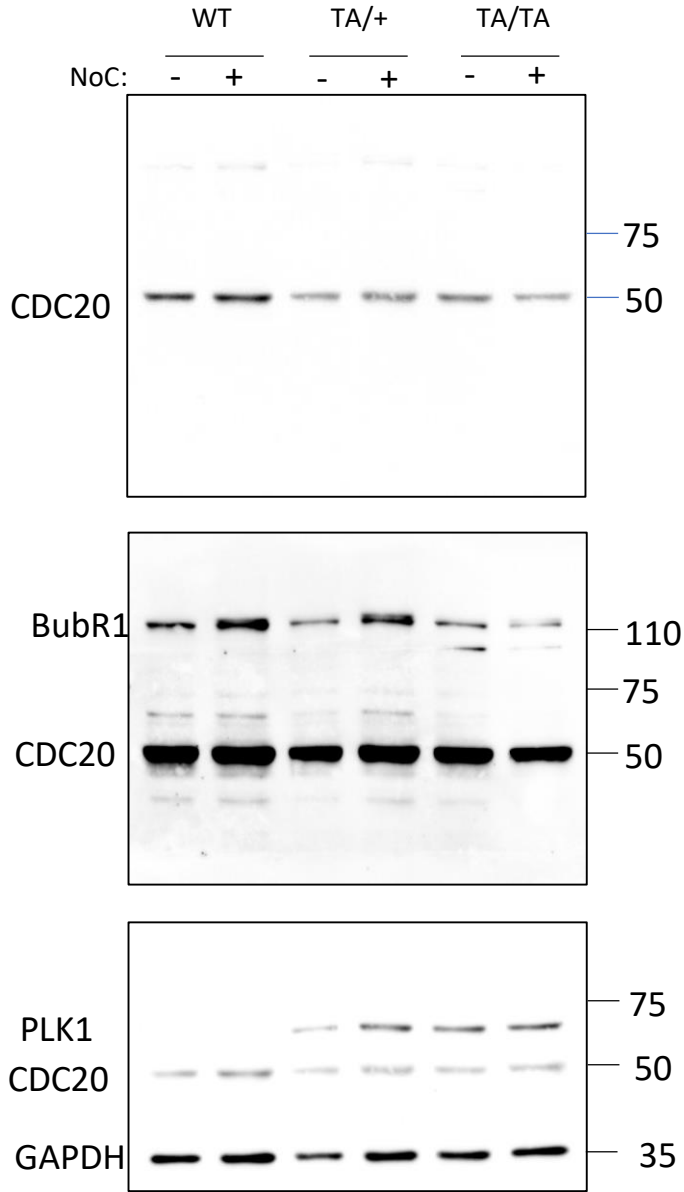

WB Figure 5C

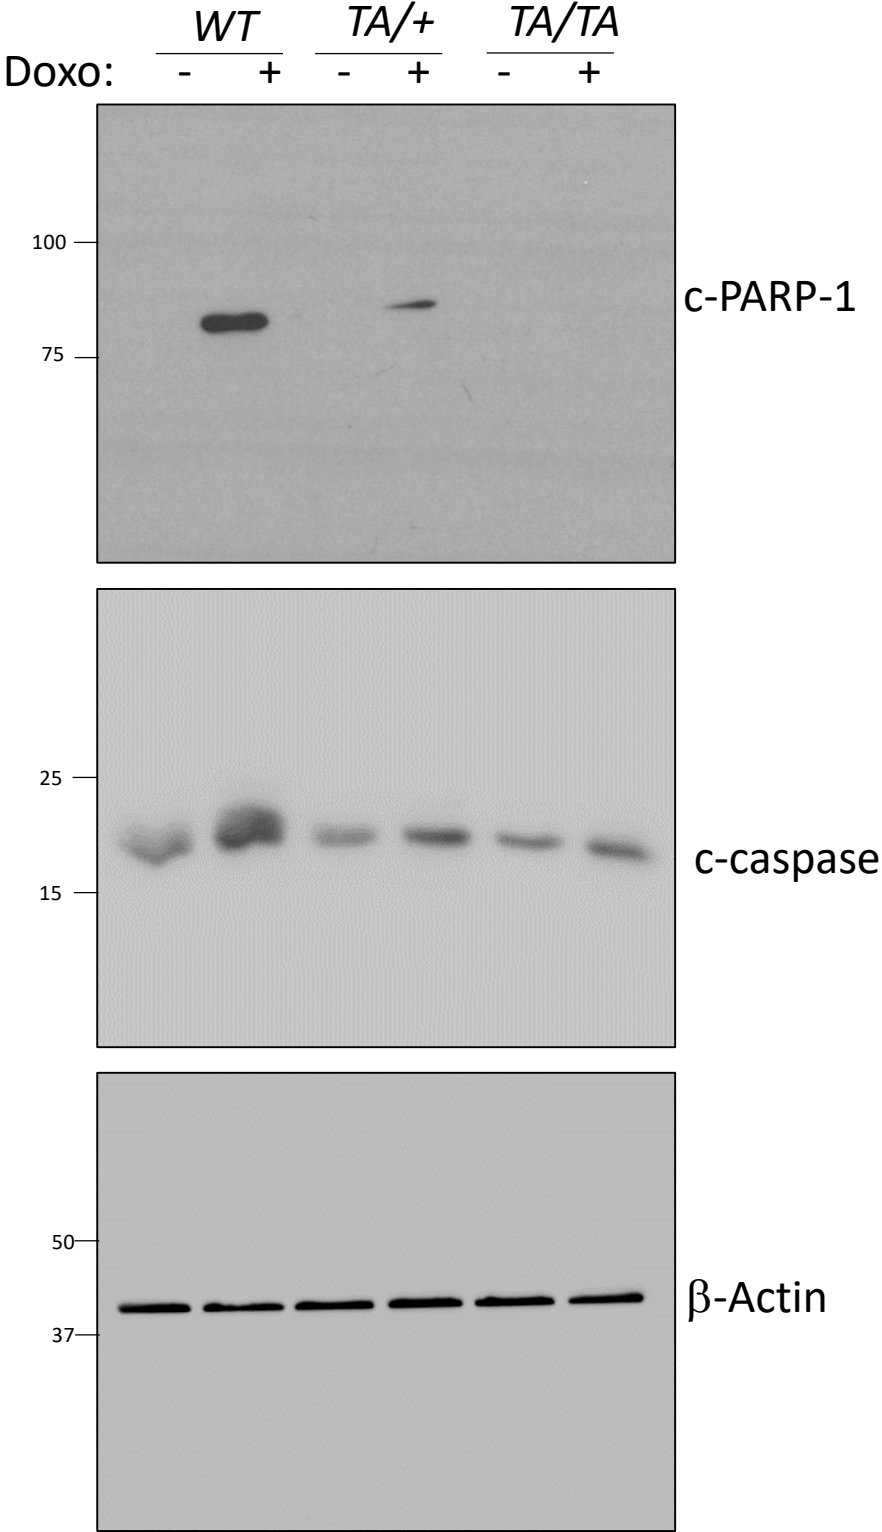

WB figure 6C

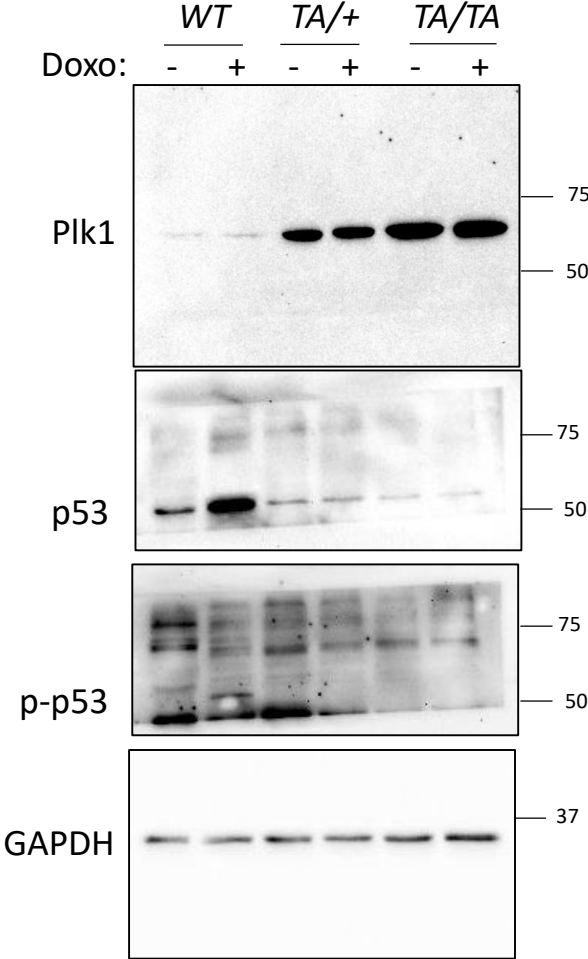

WB figure 6E

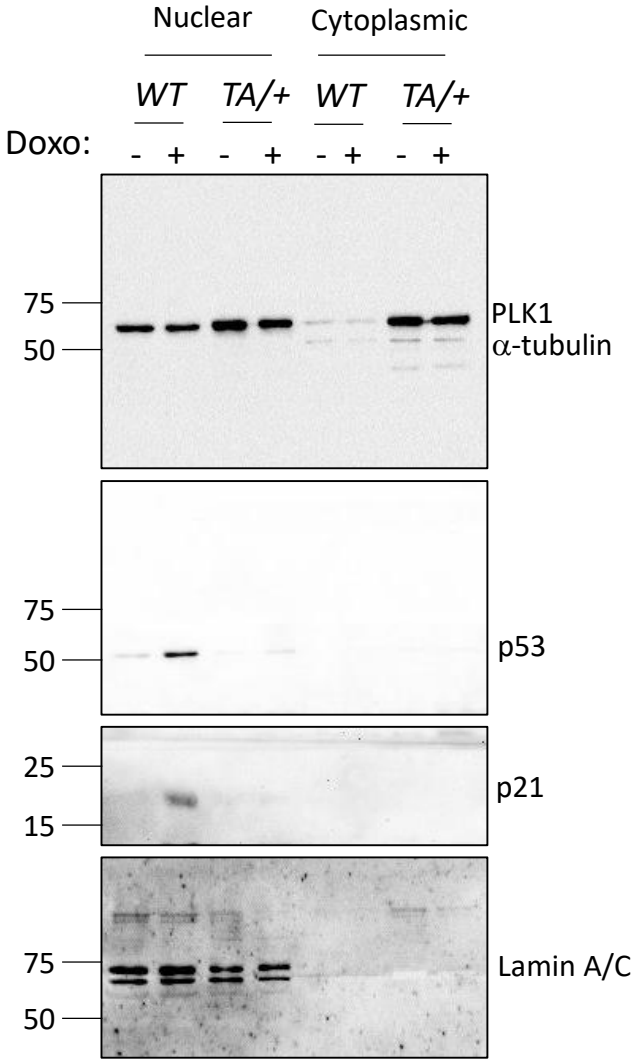

WB figure S6A

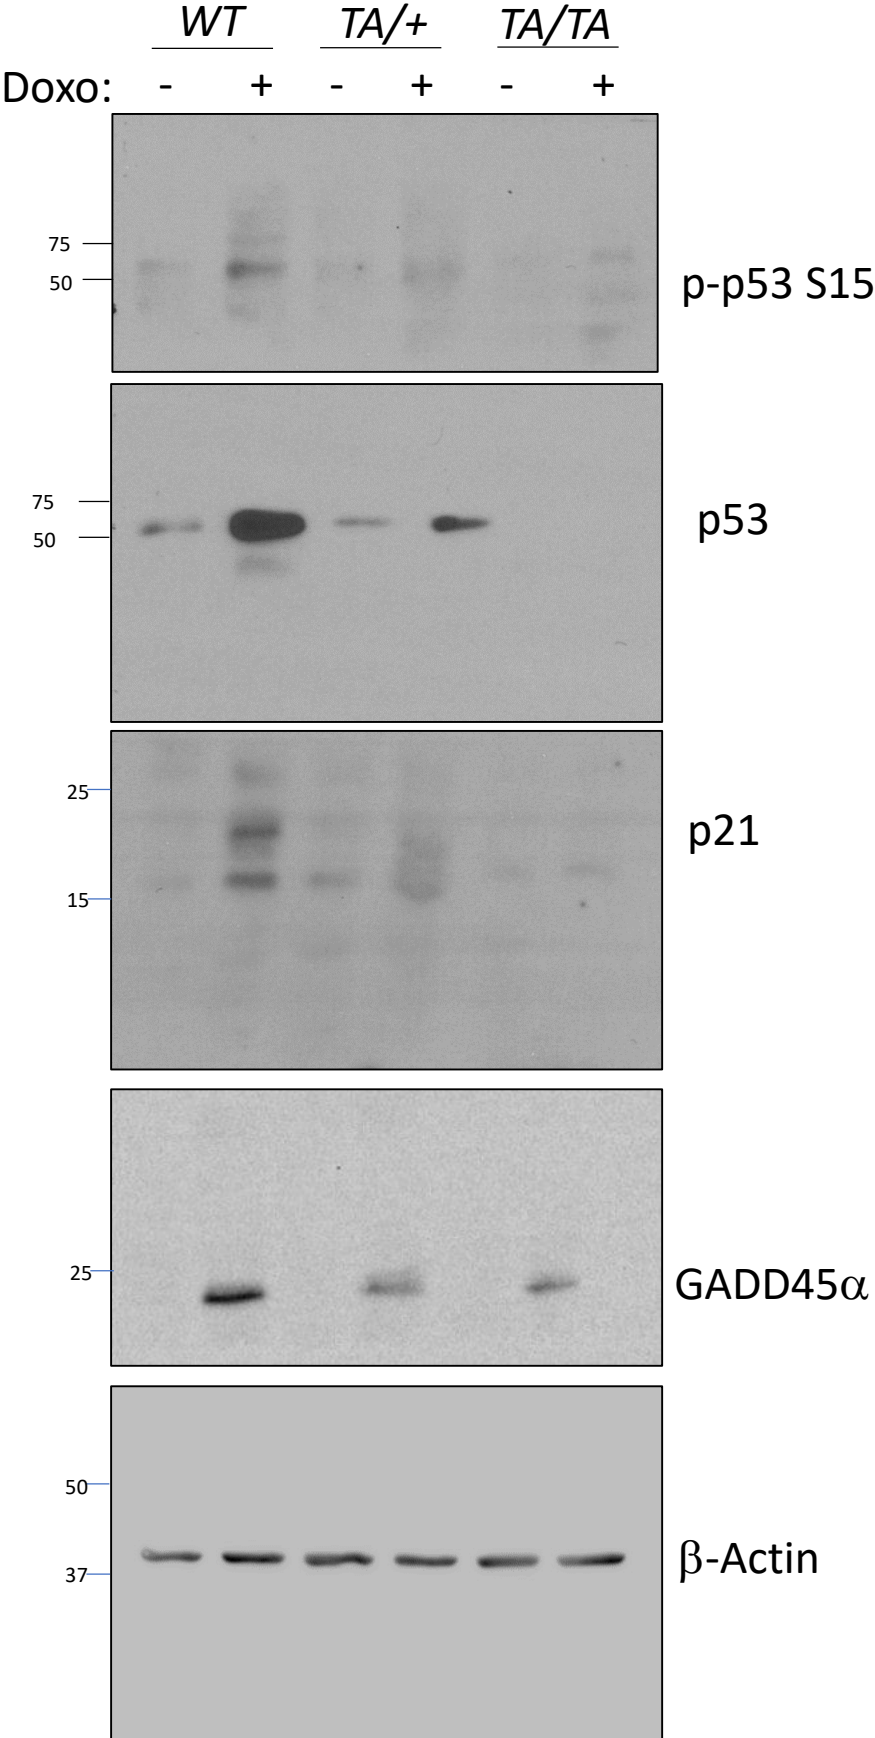

Supplement: NIHMS1658332-supplement-2.pdf [file NIHMS1658332-supplement-2.pdf]
